# Supplementary material for: Modeling of DNA Damage Repair and Cell Response in Relation to p53 System Exposed to Ionizing Radiation
Source: MDPI journal article supplement (doi:10.3390/ijms231911323), 2022-09-26
Supplement: s1 [file s1]

# Supplement materials

**Table S1.** Description of genes, mRNA and proteins in p53 system module

| Symbol                  | Description                                                                        |
|-------------------------|------------------------------------------------------------------------------------|
| DSB                     | DNA double strand break                                                            |
| ATM                     | Kinase ATM (ataxia telangiectasia-mutated)                                         |
| ATM <sub>p</sub>        | ATM phosphorylated at Ser1981 (ATM activated by DSB)                               |
| Wip1                    | Wild-type p53-induced phosphatase                                                  |
| Wip1 <sub>mRNA</sub>    | Wip1 transcript                                                                    |
| Wip1 <sub>gene</sub>    | State of the Wip1 gene: active/inactive                                            |
| SIAH1                   | Siah E3 Ubiquitin Protein Ligase 1                                                 |
| SIAH1 <sub>p</sub>      | SIAH1 phosphorylated at Ser19                                                      |
| HIPK2                   | Homeodomain interacting protein kinase 2                                           |
| p53                     | A tumor suppressor protein                                                         |
| p53 <sub>arrest</sub>   | p53 phosphorylated at Ser15, Ser20, related to cell cycle arrest                   |
| P53 <sub>killer</sub>   | p53 phosphorylated at Ser15, Ser20 and additionally at Ser46, related to apoptosis |
| P53 <sub>p46</sub>      | p53 phosphorylated at Ser46 only                                                   |
| Mdm2                    | Proto-oncogene, main cellular antagonist of p53                                    |
| Mdm2 <sub>gene</sub>    | State of the Mdm2 gene: active/inactive                                            |
| Mdm2 <sub>mRNA</sub>    | Mdm2 transcript                                                                    |
| Mdm2 <sub>cyt</sub>     | Unphosphorylated Mdm2 in cytoplasmic                                               |
| Mdm2 <sub>cyt_2p</sub>  | Mdm2 phosphorylated at Ser166 and Ser186 in cytoplasmic                            |
| Mdm2 <sub>nuc_2p</sub>  | Mdm2 phosphorylated at Ser166 and Ser186 in nucleus                                |
| Mdm2 <sub>nuc_3p</sub>  | Mdm2 phosphorylated at Ser166, 186 and additionally at Ser395 in nucleus           |
| PI3K                    | Phosphoinositide 3-Kinase                                                          |
| PTEN                    | Phosphatase And Tensin Homolog, a multi-functional tumor suppressor                |
| PTEN <sub>gene</sub>    | State of the PTEN gene: active/inactive                                            |
| PTEN <sub>mRNA</sub>    | PTEN transcript                                                                    |
| PIP2                    | Phosphatidylinositol 4,5-bisphosphate                                              |
| PIP3                    | Phosphatidylinositol 3,4,5-triphosphate                                            |
| Akt                     | AKT serine/threonine kinase                                                        |
| Akt <sub>p</sub>        | Akt phosphorylated at Thr308                                                       |
| Bax                     | BCL2 Associated X, Apoptosis Regulator                                             |
| Bax <sub>gene</sub>     | State of the Bax gene: active/inactive                                             |
| Bax <sub>mRNA</sub>     | Bax transcript                                                                     |
| Bclx <sub>L</sub>       | B-cell lymphoma-extra large, an anti-apoptotic proteins of the Bcl-2 family        |
| Bax : Bclx <sub>L</sub> | complex of Bax and Bcl-x <sub>L</sub>                                              |
| Bad                     | Bcl2 associated agonist of cell death, a member of the Bcl-2 family                |
| Bad <sub>p</sub>        | Bad phosphorylated at Ser75 and Ser99                                              |
| Bclx <sub>L</sub> : Bad | complex of Bcl-x <sub>L</sub> and Bad                                              |
| 14-3-3                  | A family of small, acidic proteins that, through functioning adaptors,             |

|                           |                                                                                                              |
|---------------------------|--------------------------------------------------------------------------------------------------------------|
|                           | scaffolds, and chaperones, regulate a variety of intracellular signaling pathways.                           |
| Bad <sub>p</sub> : 14-3-3 | complex of Bad <sub>p</sub> and 14-3-3                                                                       |
| Caspase                   | Active caspase                                                                                               |
| ProCaspase                | Inactive caspase                                                                                             |
| p21                       | A cell cycle inhibitor                                                                                       |
| p21 <sub>gene</sub>       | State of the p21 gene: active/inactive                                                                       |
| p21 <sub>mRNA</sub>       | P21 transcript                                                                                               |
| CycE                      | E-type cyclins, limiting factor for G1 phase progression and S phase entry                                   |
| p21 : CycE                | Complex of p21 and Cyclin E                                                                                  |
| Rb1                       | Retinoblastoma (RB) Transcriptional Corepressor 1, negative regulator of the cell cycle and tumor suppressor |
| Rb1                       | Rb1 phosphorylated at Ser780                                                                                 |
| E2F1                      | E2F Transcription Factor 1,                                                                                  |
| Rb1 : E2F1                | Complex of unphosphorylated Rb1 and E2F1                                                                     |
| GADD45                    | Growth Arrest And DNA Damage-Inducible Protein                                                               |
| p38                       | Mitogen-Activated Protein Kinase P38                                                                         |
| p38 <sub>p</sub>          | p38 phosphorylated at Thr180/Tyr182                                                                          |
| TGFβ                      | Transforming Growth Factor Beta                                                                              |

**Table S2.** Parameters of the p53 system module (If the reference is empty, the parameter is from Hat et al. [1])

| Symbol  | Value                              | Description                                  | Reference |
|---------|------------------------------------|----------------------------------------------|-----------|
| a1      | $3 \times 10^{-10} \text{ s}^{-1}$ | activation of proCaspases by Bax             |           |
| a2      | $1 \times 10^{-12} \text{ s}^{-1}$ | Caspases auto activation                     |           |
| q0_pten | $1 \times 10^{-5} \text{ s}^{-1}$  | PTEN gene spontaneous activation             |           |
| q0_wip1 | $1 \times 10^{-5} \text{ s}^{-1}$  | Wip1 gene spontaneous activation             |           |
| q0_mdm2 | $1 \times 10^{-4} \text{ s}^{-1}$  | Mdm1 gene spontaneous activation             |           |
| q0_bax  | $1 \times 10^{-5} \text{ s}^{-1}$  | Bax gene spontaneous activation              |           |
| q0_p21  | $1 \times 10^{-5} \text{ s}^{-1}$  | p21 gene spontaneous activation              |           |
| q1_pten | $3 \times 10^{-13} \text{ s}^{-1}$ | PTEN gene activation induced by p53_killer   |           |
| q1_wip1 | $3 \times 10^{-13} \text{ s}^{-1}$ | Mdm2 gene act'n induced by p53_arrester      |           |
| q1_mdm2 | $3 \times 10^{-13} \text{ s}^{-1}$ | Wip1 gene act'n induced by p53_arrester      |           |
| q1_p21  | $3 \times 10^{-13} \text{ s}^{-1}$ | p21 gene act'n induced by p53_arrester       |           |
| q1_bax  | $3 \times 10^{-13} \text{ s}^{-1}$ | Bax gene act'n induced by p53_killer         |           |
| q2      | $3 \times 10^{-3} \text{ s}^{-1}$  | Inactivation of Mdm2, Wip1, p21 PTEN and Bax |           |
| s1      | $0.1 \text{ s}^{-1}$               | Wip1 mRNA synthesis                          |           |
| s2      | $0.3 \text{ s}^{-1}$               | PTEN mRNA synthesis                          |           |
| s3      | $0.1 \text{ s}^{-1}$               | Mdm2 mRNA synthesis                          |           |
| s4      | $0.3 \text{ s}^{-1}$               | Bax mRNA synthesis                           |           |
| s5      | $0.1 \text{ s}^{-1}$               | p21 mRNA synthesis                           |           |
| t1      | $0.1 \text{ s}^{-1}$               | Translation of Wip1                          |           |

|     |                                    |                                                                |  |
|-----|------------------------------------|----------------------------------------------------------------|--|
| t2  | $0.1 \text{ s}^{-1}$               | Translation of PTEM                                            |  |
| t3  | $0.1 \text{ s}^{-1}$               | Translation of Mdm2                                            |  |
| t4  | $0.1 \text{ s}^{-1}$               | Translation of Bax                                             |  |
| t5  | $0.1 \text{ s}^{-1}$               | Translation of p21                                             |  |
| s6  | $300 \text{ s}^{-1}$               | p53 synthesis                                                  |  |
| s7  | $30 \text{ s}^{-1}$                | proCaspases synthesis                                          |  |
| s8  | $30 \text{ s}^{-1}$                | HIPK2 synthesis                                                |  |
| s9  | $30 \text{ s}^{-1}$                | Cyclin E synthesis induced by E2F1                             |  |
| s10 | $3 \text{ s}^{-1}$                 | Spontaneous synthesis of Cyclin E                              |  |
| p1  | $3 \times 10^{-4} \text{ s}^{-1}$  | ATM phosphorylation due to the presence of IR-induced DNA DSB  |  |
| p2  | $1 \times 10^{-8} \text{ s}^{-1}$  | SIAH1 phosphorylation by ATM <sub>p</sub>                      |  |
| p3  | $3 \times 10^{-8} \text{ s}^{-1}$  | p53 phosphorylation by ATM <sub>p</sub> at Ser15 and Ser20     |  |
| p4  | $1 \times 10^{-10} \text{ s}^{-1}$ | p53 arrester phosphorylation by HIPK2 at Ser46                 |  |
| p5  | $1 \times 10^{-8} \text{ s}^{-1}$  | Mdm2_cyt phosphorylation                                       |  |
| p6  | $1 \times 10^{-8} \text{ s}^{-1}$  | Mdm2_nuc_S116_S186 by ATM <sub>p</sub> at Ser395               |  |
| p7  | $3 \times 10^{-9} \text{ s}^{-1}$  | Bad phosphorylation by Akt <sub>p</sub>                        |  |
| p8  | $3 \times 10^{-9} \text{ s}^{-1}$  | PIP2 phosphorylation by PI3K                                   |  |
| p9  | $3 \times 10^{-6} \text{ s}^{-1}$  | Rb1 phosphorylation by Cyclin E                                |  |
| p10 | $3 \times 10^{-6} \text{ s}^{-1}$  | Rb1 phosphorylation by Cyclin E in Rb1-E2F1 complex            |  |
| p11 | $1 \times 10^{-10} \text{ s}^{-1}$ | P53 phosphorylation by HIPK2 at Ser46                          |  |
| p12 | $1 \times 10^{-9} \text{ s}^{-1}$  | Akt phosphorylation by PIP3                                    |  |
| d1  | $1 \times 10^{-8} \text{ s}^{-1}$  | ATM <sub>p</sub> dephosphorylation by Wip1                     |  |
| d2  | $3 \times 10^{-5} \text{ s}^{-1}$  | SIAH1 <sub>p</sub> dephosphorylation                           |  |
| d3  | $1 \times 10^{-4} \text{ s}^{-1}$  | Spontaneous dephosphorylation of p53 arrester                  |  |
| d4  | $1 \times 10^{-10} \text{ s}^{-1}$ | P53 killer dephosphorylation of Ser46 by Wip1                  |  |
| d5  | $1 \times 10^{-4} \text{ s}^{-1}$  | Spontaneous dephosphorylation of Mdm2_cyt_S166p_S186p          |  |
| d6  | $3 \times 10^{-5} \text{ s}^{-1}$  | Mdm2_nuc_S166p_S186p_S395p dephosphorylation of S395p by Wip1  |  |
| d7  | $3 \times 10^{-7} \text{ s}^{-1}$  | PIP3 dephosphorylation to PIP2 by PTEN                         |  |
| d8  | $1 \times 10^{-4} \text{ s}^{-1}$  | Spontaneous dephosphorylation of Akt <sub>p</sub>              |  |
| d9  | $3 \times 10^{-5} \text{ s}^{-1}$  | Spontaneous dephosphorylation of Bad <sub>p</sub>              |  |
| d10 | $1 \times 10^{-4} \text{ s}^{-1}$  | Spontaneous dephosphorylation of p53 killer at Ser15 and Ser20 |  |
| d11 | $1 \times 10^{-10} \text{ s}^{-1}$ | p53_s46 dephosphorylation by Wip1                              |  |
| d12 | $1 \times 10^4 \text{ s}^{-1}$     | Rb1 dephosphorylation                                          |  |
| b1  | $1 \times 10^{-5} \text{ s}^{-1}$  | Binding of Bax and BclX <sub>L</sub>                           |  |
| b2  | $3 \times 10^{-5} \text{ s}^{-1}$  | Binding of Bad and BclX <sub>L</sub>                           |  |
| b3  | $3 \times 10^{-3} \text{ s}^{-1}$  | Binding of Bad <sub>p</sub> and 14-3-3                         |  |
| b4  | $1 \times 10^{-5} \text{ s}^{-1}$  | Binding of Rb1 and E2F1                                        |  |
| b5  | $1 \times 10^{-5} \text{ s}^{-1}$  | Binding of p21 and Cyclin E                                    |  |

|            |                                    |                                                              |        |
|------------|------------------------------------|--------------------------------------------------------------|--------|
| u1         | $1 \times 10^{-3} \text{ s}^{-1}$  | Unbinding of Bax and BclX <sub>L</sub> complex               |        |
| u2         | $1 \times 10^{-3} \text{ s}^{-1}$  | Unbinding of Bad and BclX <sub>L</sub> complex               |        |
| u3         | $1 \times 10^{-3} \text{ s}^{-1}$  | Unbinding of Bad <sub>p</sub> and 14-3-3 complex             |        |
| u5         | $1 \times 10^{-4} \text{ s}^{-1}$  | Unbinding of Rb1-E2F1 complex                                |        |
| u6         | $1 \times 10^{-4} \text{ s}^{-1}$  | Unbinding of p21-Cyclin E complex                            |        |
| i1         | $1 \times 10^{-3} \text{ s}^{-1}$  | Mdm2_cyt_S166p_S186p nuclear import                          |        |
| g1         | $3 \times 10^{-4} \text{ s}^{-1}$  | mRNA_Wip1 degradation                                        |        |
| g2         | $3 \times 10^{-4} \text{ s}^{-1}$  | mRNA_PTEN degradation                                        |        |
| g3         | $3 \times 10^{-4} \text{ s}^{-1}$  | mRNA_Mdm2 degradation                                        |        |
| g4         | $3 \times 10^{-4} \text{ s}^{-1}$  | mRNA_Bax degradation                                         |        |
| g5         | $3 \times 10^{-4} \text{ s}^{-1}$  | mRNA_p21 degradation                                         |        |
| g6         | $3 \times 10^{-5} \text{ s}^{-1}$  | PTEN degradation                                             |        |
| g7         | $1 \times 10^{-13} \text{ s}^{-1}$ | HIPK2 degradation driven by Mdm2_nuc_2p and SIAH1            |        |
| g8         | $3 \times 10^{-4} \text{ s}^{-1}$  | Wip1 degradation                                             |        |
| g9         | $1 \times 10^{-4} \text{ s}^{-1}$  | Bax degradation                                              |        |
| g10        | $1 \times 10^{-5} \text{ s}^{-1}$  | Spontaneous degradation of p53                               |        |
| g101       | $1 \times 10^{-5} \text{ s}^{-1}$  | Spontaneous degradation of p53 arrester                      |        |
| g11        | $1 \times 10^{-2} \text{ s}^{-1}$  | p53 degradation induced by Mdm2_nuc_S166p_S186p              |        |
| g12        | $1 \times 10^{-13} \text{ s}^{-1}$ | p53_arrester degradation induced by Mdm2_nuc_S166p_S186p     |        |
| g13        | $1 \times 10^{-13} \text{ s}^{-1}$ | p53_killer degradation induced by Mdm2_nuc_S166p_S186p       |        |
| g14        | $1 \times 10^{-4} \text{ s}^{-1}$  | Mdm2_cyt degradation                                         |        |
| g15        | $3 \times 10^{-5} \text{ s}^{-1}$  | Spontaneous degradation of phosphorylated Mdm2               |        |
| g16        | $1 \times 10^{-4} \text{ s}^{-1}$  | Mdm2_nuc_S166p_S186p_S395p degradation                       |        |
| g17        | $3 \times 10^{-4} \text{ s}^{-1}$  | proCaspases degradation                                      |        |
| g18        | $3 \times 10^{-4} \text{ s}^{-1}$  | Caspase degradation                                          |        |
| g19        | $3 \times 10^{-4} \text{ s}^{-1}$  | p21 degradation                                              |        |
| g20        | $1 \times 10^{-4} \text{ s}^{-1}$  | Cyclin E degradation                                         |        |
| kGADD45act | $4 \times 10^{-9} \text{ s}^{-1}$  | GADD45 Activation / Production                               | [2]    |
| kGADD45deg | $1 \times 10^{-5} \text{ s}^{-1}$  | GADD45 Degradation                                           | [2]    |
| kp38phos   | $8 \times 10^{-3} \text{ s}^{-1}$  | p38 Phosphorylation                                          | [3]    |
| kp38dphos  | $0.1 \text{ s}^{-1}$               | p38 Phosphorylation                                          | [3]    |
| kTGFbeta   | $0.1 \text{ s}^{-1}$               | generating TGFbeta by p38p                                   | [3]    |
| M1         | 7 or 25                            | Michaelis-Menten constant in ATM phosphorylation due to DSBs | [1, 4] |
| M2         | $1 \times 10^5$                    | Michaelis-Menten constant in Rb1 dephosphorylation at Ser567 |        |
| M3         | $2 \times 10^5$                    | Michaelis-Menten constant in E2F1-induced Cyclin E synthesis |        |

**Table S3.** Description of the gene, mRNA and protein interactions in p53 system

| Reaction                                                                                              | Rate $\rightarrow$                                 | Rate $\leftarrow$                                                                                      |
|-------------------------------------------------------------------------------------------------------|----------------------------------------------------|--------------------------------------------------------------------------------------------------------|
| $\text{Wip1}_{\text{gene}}(\text{inactive}) \leftrightarrow \text{Wip1}_{\text{gene}}(\text{active})$ | $q0\_wip1 + q1\_wip1 * p53\text{arrester}^2$       | $q2$                                                                                                   |
| $\text{Mdm2}_{\text{gene}}(\text{inactive}) \leftrightarrow \text{Mdm2}_{\text{gene}}(\text{active})$ | $q0\_mdm2 + q1\_mdm2 * p53\text{arrester}^2$       | $q2$                                                                                                   |
| $p21_{\text{gene}}(\text{inactive}) \leftrightarrow p21_{\text{gene}}(\text{active})$                 | $q0\_p21 + q1\_p21 * p53\text{arrester}^2$         | $q2$                                                                                                   |
| $\text{PTEN}_{\text{gene}}(\text{inactive}) \leftrightarrow \text{PTEN}_{\text{gene}}(\text{active})$ | $q0\_pten + q1\_pten * p53\text{killer}^2$         | $q2$                                                                                                   |
| $\text{Bax}_{\text{gene}}(\text{inactive}) \leftrightarrow \text{Bax}_{\text{gene}}(\text{active})$   | $q0\_bax + q1\_bax * p53\text{killer}^2$           | $q2$                                                                                                   |
| $\text{ATM} \leftrightarrow \text{ATM}_p$                                                             | $p1 * \text{DSB}^2 / (\text{M1}^2 + \text{DSB}^2)$ | $d1 * \text{Wip1}$                                                                                     |
| $\text{SIAH1} \leftrightarrow \text{SIAH1}_p$                                                         | $p2 * \text{ATM}_p$                                | $d2$                                                                                                   |
| $\Phi \leftrightarrow \text{HIPK2}$                                                                   | $\text{S8}$                                        | $g7 * (\text{SIAH1}_0 + \text{Mdm2\_nuc\_S166S186p}) * (\text{SIAH1}_0 + \text{Mdm2\_nuc\_S166S186p})$ |
| $\Phi \leftrightarrow \text{Wip1}_{\text{mRNA}}$                                                      | $s1 * \text{Wip1}_{\text{gene}}/2$                 | $g1$                                                                                                   |
| $\Phi \leftrightarrow \text{Wip1}$                                                                    | $t1 * \text{Wip1}_{\text{mRNA}}$                   | $g8$                                                                                                   |
| $\Phi \leftrightarrow p53$                                                                            | $s6$                                               | $g101 + g11 * \text{Mdm2\_nuc\_2p}^2$                                                                  |
| $p53 \text{ arrester} \rightarrow \Phi$                                                               | $g12 * \text{Mdm2\_nuc\_S166S186p}^2$              | -                                                                                                      |
| $p53 \text{ S46p} \rightarrow \Phi$                                                                   | $g13 * \text{Mdm2\_nuc\_S166S186p}^2$              | -                                                                                                      |
| $p53 \text{ killer} \rightarrow \Phi$                                                                 | $g13 * \text{Mdm2\_nuc\_S166S186p}^2$              | -                                                                                                      |
| $p53 \leftrightarrow p53 \text{ arrester}$                                                            | $p3 * \text{ATM}_p$                                | $d3$                                                                                                   |
| $p53 \text{ S46p} \leftrightarrow p53 \text{ killer}$                                                 | $p3 * \text{ATM}_p$                                | $d3$                                                                                                   |
| $p53 \text{ arrester} \leftrightarrow p53 \text{ killer}$                                             | $p3 * \text{HIPK2}$                                | $d4 * \text{Wip1}$                                                                                     |
| $p53 \leftrightarrow p53 \text{ S46p}$                                                                | $p3 * \text{HIPK2}$                                | $d4 * \text{Wip1}$                                                                                     |
| $\Phi \leftrightarrow \text{Mdm2}_{\text{mRNA}}$                                                      | $s3 * \text{Mdm2}_{\text{gene}}/2$                 | $g3$                                                                                                   |
| $\Phi \leftrightarrow \text{Mdm2\_cyt\_0p}$                                                           | $t3 * \text{Mdm2}_{\text{mRNA}}$                   | $g14$                                                                                                  |
| $\text{Mdm2\_cyt\_S166S186p} \rightarrow \Phi$                                                        | $g15$                                              | -                                                                                                      |
| $\text{Mdm2\_nuc\_S166S186p} \rightarrow \Phi$                                                        | $g16$                                              | -                                                                                                      |
| $\text{Mdm2\_cyt\_0p} \leftrightarrow \text{Mdm2\_cyt\_S166S186p}$                                    | $p5 * \text{Akt}_p$                                | $d5$                                                                                                   |

|                                                            |                                                                             |                                   |
|------------------------------------------------------------|-----------------------------------------------------------------------------|-----------------------------------|
| Mdm2_cyt_S166S186p→Mdm2_nuc_S166S186p                      | i1                                                                          | -                                 |
| Mdm2_nuc_S166S186p←→Mdm2_nuc_S166S186p_S395p               | p6*ATMp                                                                     | d6*Wip1                           |
| $\Phi \leftarrow \rightarrow PTEN_{mRNA}$                  | s2*PTEN <sub>gene</sub> /2                                                  | g2                                |
| $\Phi \leftarrow \rightarrow PTEN$                         | t2*PTEN <sub>mRNA</sub>                                                     | g6                                |
| PIP2←→PIP3                                                 | p8*PI3K                                                                     | d7*PTEN                           |
| Akt←→Akt <sub>p</sub>                                      | p12*PIP3                                                                    | d8                                |
| $\Phi \leftarrow \rightarrow p21_{mRNA}$                   | g5*p21 <sub>gene</sub>                                                      | g5                                |
| $\Phi \leftarrow \rightarrow p21$                          | t5*p21 <sub>mRNA</sub>                                                      | g19                               |
| $\Phi \leftarrow \rightarrow CycE$                         | s10 + s9 *<br>E2F1 <sup>2</sup> / (E2F1 <sup>2</sup><br>+ M3 <sup>2</sup> ) | g20                               |
| p21+CycE←→p21:CycE                                         | b5                                                                          | u6                                |
| p21:CycE→Φ                                                 | g20                                                                         | -                                 |
| Rb1←→Rb1 <sub>p</sub>                                      | p9*CycE                                                                     | d12 / (M2 +<br>Rb1 <sub>p</sub> ) |
| Rb1+E2F1←→Rb1:E2F1                                         | b4                                                                          | u5                                |
| Rb1:E2F1→Rb1 <sub>p</sub> +E2F1                            | p10 * CycE                                                                  | -                                 |
| $\Phi \leftarrow \rightarrow Bax_{mRNA}$                   | s4*Bax <sub>gene</sub> /2                                                   | g4                                |
| $\Phi \leftarrow \rightarrow Bax$                          | t4*Bax <sub>mRNA</sub>                                                      | g9                                |
| Bax+Bclx <sub>L</sub> ←→ Bax:Bclx <sub>L</sub>             | b1                                                                          | u1                                |
| Bax:Bclx <sub>L</sub> → Bclx <sub>L</sub>                  | g16                                                                         | -                                 |
| Bad+Bclx <sub>L</sub> ←→Bad:Bclx <sub>L</sub>              | b2                                                                          | u2                                |
| Bad:Bclx <sub>L</sub> →Bad <sub>p</sub> +Bclx <sub>L</sub> | p7*Akt <sub>p</sub>                                                         | -                                 |
| Bad←→Bad <sub>p</sub>                                      | p7*Akt <sub>p</sub>                                                         | d9                                |
| Bad+14-3-3←→Bad:14-3-3                                     | b3                                                                          | u3                                |
| Bad:14-3-3→Bad <sub>p</sub> +14-3-3                        | d9                                                                          | -                                 |
| $\Phi \leftarrow \rightarrow proCaspase$                   | s7                                                                          | g17                               |
| proCaspase→Caspase                                         | a1*Bax +<br>a2*Caspase <sup>2</sup>                                         | -                                 |
| Caspase→Φ                                                  | g17                                                                         | -                                 |
| $\Phi \leftarrow \rightarrow GADD45$                       | kGADD45act *<br>p21                                                         | kGADD45deg                        |
| p38←→p38 <sub>p</sub>                                      | kp38phos *<br>GADD45                                                        | kp38dphos                         |
| $\Phi \rightarrow TGF\beta$                                | kTGFbeta*p38 <sub>p</sub>                                                   | -                                 |

Φ means empty set, no protein or no mRNA.

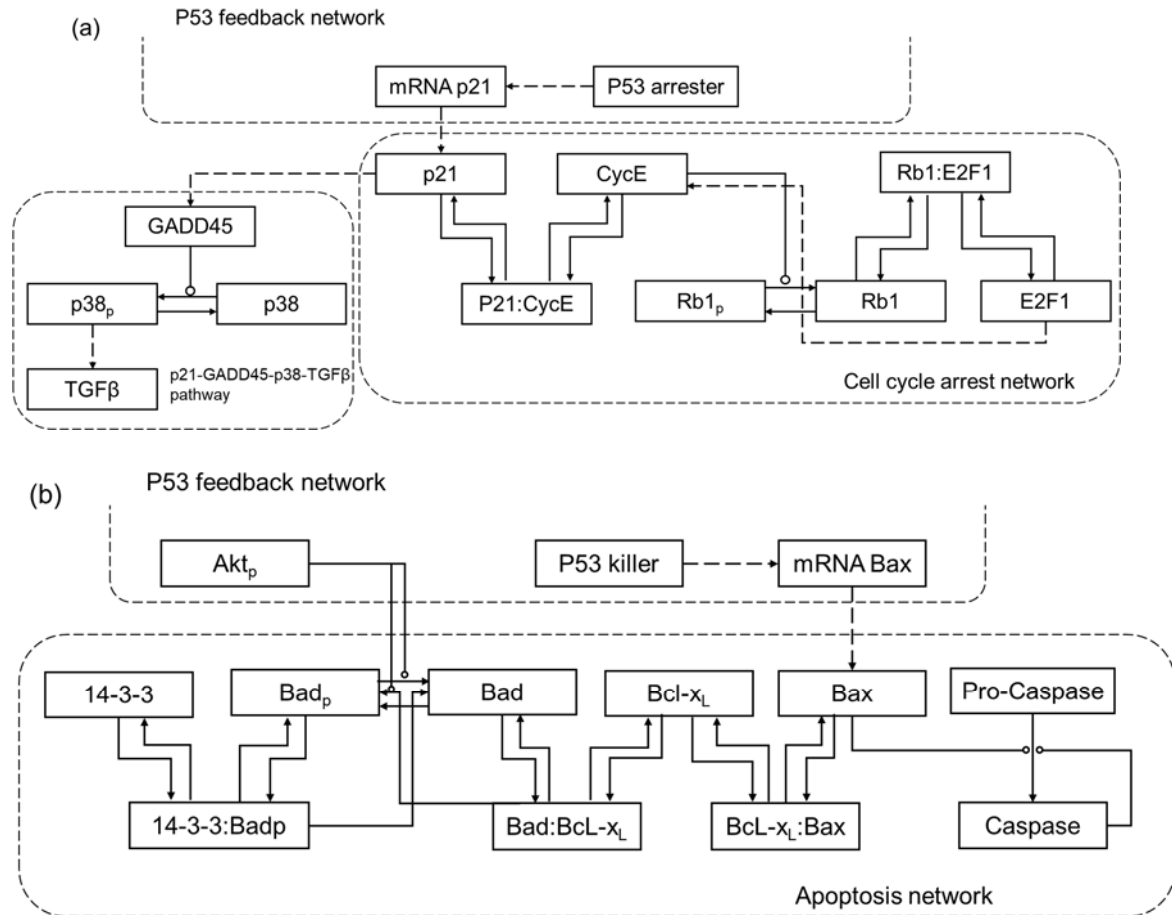

**Figure S1.** Detailed scheme of (a)the cell cycle arrest network and (b)apoptosis network in the p53 system. These two models are established based on the model of Hat et al. Arrow-headed dashed lines indicate positive transcriptional regulation, arrow-headed solid lines—protein transformation, circle-headed solid lines—positive influence or activation, hammer-headed solid lines—inhibitory regulation.

## References

1. Hat, B.; Kochanczyk, M.; Bogdal, M. N.; Lipniacki, T., Feedbacks, Bifurcations, and Cell Fate Decision-Making in the p53 System. *PLoS Comput Biol* **2016**, 12, (2), e1004787.
2. Dolan, D. W.; Zupanic, A.; Nelson, G.; Hall, P.; Miwa, S.; Kirkwood, T. B.; Shanley, D. P., Integrated Stochastic Model of DNA Damage Repair by Non-homologous End Joining and p53/p21-Mediated Early Senescence Signalling. *PLoS Comput Biol* **2015**, 11, (5), e1004246.
3. Passos, J. F.; Nelson, G.; Wang, C.; Richter, T.; Simillion, C.; Proctor, C. J.; Miwa, S.; Olijslagers, S.; Hallinan, J.; Wipat, A.; Saretzki, G.; Rudolph, K. L.; Kirkwood, T. B.; von Zglinicki, T., Feedback between p21 and reactive oxygen production is necessary for cell senescence. *Mol Syst Biol* **2010**, 6, 347.
4. Ma, L.; Wagner, J.; Rice, J. J.; Hu, W.; Levine, A. J.; Stolovitzky, G. A., A plausible model for the digital response of p53 to DNA damage. *Proc Natl Acad Sci U S A* **2005**, 102, (40), 14266-71.
